# Supplementary material for: Association of Genetic Polymorphisms with Atopic Dermatitis, Clinical Severity and Total IgE: A Replication and Extended Study
Source: PubMed Central journal article supplement — Allergy Asthma Immunol Res. 2018 Jun 15;10(4):397–405. doi: 10.4168/aair.2018.10.4.397 (PMC6021591; doi:10.4168/aair.2018.10.4.397), 2018-06-15
Supplement: aair-10-397-s001.pdf [file aair-10-397-s001.pdf]

**Supplementary Table 1.** Detailed information of each SNP

| SNP        | (Nearby) gene                | Chr.:Pos.*  | Locus      |
|------------|------------------------------|-------------|------------|
| rs6682925  | <i>IL23R</i>                 | 1:67165579  | Intron     |
| rs7622183  | <i>IL5RA</i>                 | 3:3110977   | Promoter   |
| rs17454584 | ( <i>IL2</i> )               | 4:122432277 | Intergenic |
| rs17389644 | ( <i>IL21</i> )              | 4:122576542 | Intergenic |
| rs10214237 | ( <i>IL7R</i> )              | 5:35883632  | Intergenic |
| rs13361382 | <i>TMEM232</i>               | 5:110713253 | Intron     |
| rs6871536  | <i>RAD50/TH2LCRR</i>         | 5:132634182 | Intron     |
| rs2569190  | <i>CD14/TMCO6</i>            | 5:140633331 | Intron     |
| rs11741861 | <i>IRGM/ZNF300</i>           | 5:150898347 | Intron     |
| rs4713555  | ( <i>HLA-DRB1/HLA-DQA1</i> ) | 6:32607747  | Intergenic |
| rs2275913  | <i>IL17A</i>                 | 6:52186235  | Promoter   |
| rs9357733  | <i>EFHC1</i>                 | 6:52427338  | Intron     |
| rs4271002  | <i>NAT2</i>                  | 8:18390758  | Intron     |
| rs6473227  | ( <i>ZBTB10</i> )            | 8:80373657  | Intergenic |
| rs4246905  | <i>TNFSF15</i>               | 9:114790969 | Intron     |
| rs2212434  | ( <i>EMSY</i> )              | 11:76570549 | Intergenic |
| rs2143950  | ( <i>PPP2R3C</i> )           | 14:35103151 | Intron     |

SNP, single nucleotide polymorphism; Chr., chromosome; Pos., position; NCBI, National Center for Biotechnology Information.

\*Chr. and Pos. are based on GRCh38.p7 of the NCBI.
