# Supplementary material for: Association of Genetic Polymorphisms with Atopic Dermatitis, Clinical Severity and Total IgE: A Replication and Extended Study
Source: PubMed Central journal article supplement — Allergy Asthma Immunol Res. 2018 Jun 15;10(4):397–405. doi: 10.4168/aair.2018.10.4.397 (PMC6021591; doi:10.4168/aair.2018.10.4.397), 2018-06-15
Supplement: aair-10-397-s002.pdf [file aair-10-397-s002.pdf]

**Supplementary Table 2.** References for our selection of 17 SNPs

| SNP        | (Nearby) gene                   | Reference (PMID#)                      |
|------------|---------------------------------|----------------------------------------|
| rs6682925  | <i>IL23R</i>                    | 21982596, 20393462, 23393581           |
| rs7622183  | <i>IL5RA</i>                    | 16217591, 29380403, 17620072           |
| rs17454584 | ( <i>ADAD1/IL2</i> )            | 25865352, 24766371                     |
| rs17389644 | ( <i>IL21</i> )                 | 23727859, 25865352                     |
| rs10214237 | ( <i>IL7R</i> )                 | 26482879, 20466416                     |
| rs13361382 | <i>TMEM232</i>                  | 21666691, 22545103, 22448455           |
| rs6871536  | <i>RAD50/TH2LCRR</i>            | 23886662, 26493291                     |
| rs2569190  | <i>CD14/TMCO6</i>               | 27624002, 24848505, 20109750           |
| rs11741861 | <i>IRGM/ZNF300</i>              | 21300624, 29484179, 28187197           |
| rs4713555  | ( <i>HLA-DRB1/HLA-DQA1</i> )    | 26482879, 26307177, 22548207           |
| rs2275913  | <i>IL17A</i>                    | 28647382, 27004062, 22229441           |
| rs9357733  | <i>EFHC1</i>                    | 26542096, 27931536                     |
| rs4271002  | <i>NAT2</i>                     | 23622008, 26540500, 16224574           |
| rs6473227  | ( <i>ZBTB10</i> )               | 26482879, 27777593                     |
| rs4246905  | <i>TNFSF15</i>                  | 22017439, 29335258, 19543369, 27336838 |
| rs2212434  | ( <i>EMSY</i> )                 | 26482879, 25574825, 29051540           |
| rs2143950  | ( <i>LOC101927178/PPP2R3C</i> ) | 26482879, 27777593, 26377142           |

SNP, single nucleotide polymorphism.
